# Supplementary material for: Structural and biochemical basis for misfolded RNA recognition by the Ro autoantigen
Source: Springer Nature journal article supplement (doi:10.1038/nsmb1156), 2006-10-15
Supplement: 41594_2006_BFnsmb1156_MOESM1_ESM.pdf [file 41594_2006_BFnsmb1156_MOESM1_ESM.pdf]

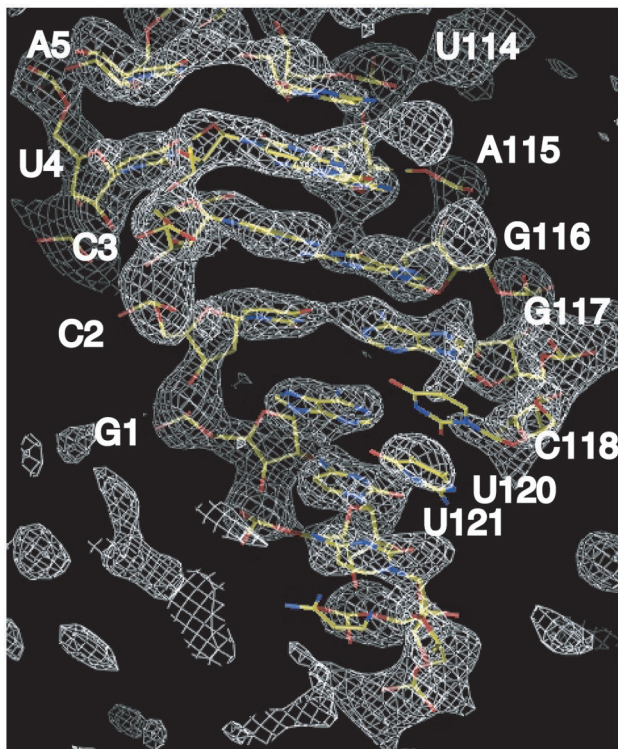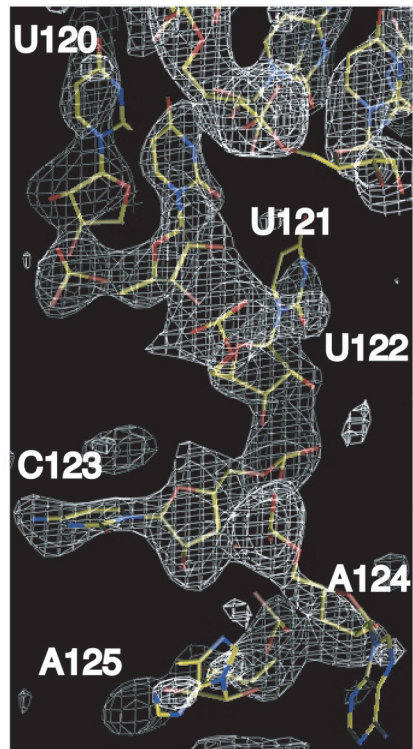

**Supplementary Figure 1.** Difference electron density maps for RNA. Representative difference (Fo-Fc) electron density for double (left) and single-stranded (right) RNA into which RNA was initially modeled. The density from the 2.8 Å map is shown at two times the rms variation of the map. The refined model for this portion of the RNA is shown in a stick representation.
